# Supplementary material
Source: Springer Nature journal article supplement (https://www.springermedizin.de/resource/supplementary/13058_2005_1332_MOESM5_ESM.pdf/9698874)

■ AdCXCR4Luc    ■ AdSurvivinLuc    ■ AdCox2MLuc  
■ AdSLPILuc    □ AdEGP-2Luc

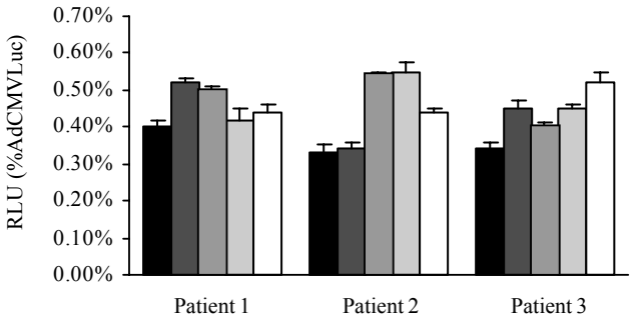

Supplement: MOESM5 [file 9698874]
